1 **Sex-specific niche signaling contributes to sexual dimorphism following stem cell**  
2 **transplantation**

3

4 Julianne N.P. Smith<sup>1</sup>, Brittany A. Cordova<sup>1</sup>, Brian Richardson<sup>1</sup>, Kelsey F. Christo<sup>1</sup>, Jordan  
5 Campanelli<sup>1</sup>, Alyssia V. Broncano<sup>1</sup>, Jonathan Chen<sup>1</sup>, Juyeun Lee<sup>1,2</sup>, Scott J. Cameron<sup>2</sup>, Justin  
6 D. Lathia<sup>1,2</sup>, Wendy A. Goodman<sup>1</sup>, Mark J. Cameron<sup>1</sup>, Amar B. Desai<sup>1</sup>

7 <sup>1</sup> Case Comprehensive Cancer Center Case Western Reserve University, Cleveland OH USA

8 <sup>2</sup>Lerner Research Institute, Cleveland Clinic, Cleveland OH USA

9

10 \*Correspondence:

11 Amar B. Desai

12 Department of Medicine and Case Comprehensive Cancer Center

13 Case Western Reserve University

14 Abd10@case.edu

15

16

17 Running title: The niche contributes to hematopoietic dimorphism

18 Total word count: 6270

19 Abstract word count: 225

20 Figures: 7

21 Tables: 0

22 References: 44

23

24

25

26

27

28

29

30

31

1 **Abstract:**

2 Hematopoietic stem cell (HSC) transplantation (HST) is a curative treatment for many  
3 hematopoietic cancers and bone marrow (BM) disorders but is currently limited by numerous  
4 complications including a lengthy recovery period, prolonged neutropenia resulting in severe  
5 infections and bleeding, and a high incidence of graft vs. host disease (GVHD). While clinical  
6 studies have demonstrated that sex mismatch, notably male recipients with female donor cells,  
7 results in increased risk of GVHD (likely due to male recipient minor histocompatibility antigens  
8 targeted by donor female T-cells<sup>1</sup>), increased non-relapse mortality, and decreased overall  
9 survival, the mechanisms underlying sex-determinants on hematopoiesis and post-transplant  
10 recovery are not clear. In this manuscript we have identified: 1) unique expression of  
11 hematopoietic niche factors in the BM and spleens of male and female mice, 2) altered kinetics  
12 of hematopoietic reconstitution following transplantation when male vs. female BM is used as  
13 the donor cell source, 3) a sex-specific role for the recipient niche in promoting post HST  
14 recovery, and 4) a dose-dependent role for exogenous sex hormones in maintaining  
15 hematopoietic stem and progenitor cells (HSPCs). Taken together, these data demonstrate that  
16 sex-specific cellular and molecular signaling occurs during hematopoietic regeneration. Further  
17 identifying novel sex-dependent determinants of regeneration following transplantation will not  
18 only enhance understanding of steady state versus regeneration hematopoiesis but may also  
19 reveal unique (and potentially sex-specific) therapeutic targets to accelerate hematologic  
20 recovery.

21

22 **Key Points:**

- 23 (1) Male and female mice display altered kinetics of regeneration following HST due to unique  
24 niche factors in hematopoietic compartments.
- 25 (2) Exogenous steroid sex hormones uniquely regulate the pool of hematopoietic stem and  
26 progenitor cells and may impact transplantation outcomes.

1 **Introduction:**

2 Hematopoietic stem cells (HSCs) are derived from the bone marrow (BM) and tasked with  
3 ensuring a consistent output of differentiated blood cell types throughout the lifetime of an  
4 organism. This involves balancing the acts of self-renewal, differentiation to mature progeny,  
5 and proliferation in response to infection, stress, or injury to provide lifelong hematopoietic  
6 function. At homeostasis, HSCs maintain genomic stability and avoid replicative stress by  
7 existing in a quiescent state, enforced by both HSC intrinsic and microenvironmental cues.  
8 During stress, which can be triggered by infection, inflammation, bleeding, certain medications,  
9 exposure to irradiation or chemotherapy, or by procedures such as hematopoietic stem cell  
10 transplantation (HST), a regenerative hematopoiesis program occurs in which HSCs receive  
11 specific signals to activate and produce progenitor populations capable of restoring homeostasis  
12 through mobilization and differentiation to replenish depleted populations. Elucidating the  
13 specific signaling pathways associated with regenerative hematopoiesis has implications for the  
14 approximately ~25,000 HST are performed each year in the United States to treat conditions  
15 including several plasma cell dyscrasias – most of which constitute multiple myeloma, non-  
16 Hodgkin's lymphoma, acute myeloid leukemia, myelodysplastic syndrome, and acute  
17 lymphocytic leukemia.

18

19 Current efforts to improve HST efficacy involve minimizing both recipient risk factors (including  
20 diagnosis stage, time to transplant, age, and opportunistic infections) and donor risk factors  
21 (including HLA mismatch, age, KIR genotype, and sex mismatch)<sup>2</sup>. While recent literature has  
22 identified intrinsic differences in hematopoietic properties between males and females, including  
23 observing reduced frequencies of circulating hematopoietic progenitor cells in females versus  
24 males<sup>3</sup> and elucidating critical roles for gonad derived sex hormones in maintenance of HSC  
25 self-renewal and proliferative capacity,<sup>4 5</sup> major gaps exist in understanding sexual dimorphism

1 in the context of hematopoietic regeneration. Additionally, with our lab's recent work implicating  
2 a role for the splenic niche in HST biology,<sup>6</sup> defining the sex-dependent role of each  
3 hematopoietic compartment in post-transplant hematopoiesis remains a priority for not only  
4 fundamental understanding of HST, but also its clinical use. Here we use a variety of *in vitro*  
5 culture models along with *in vivo* transplantation assays to provide novel biological insights into  
6 sex-specific drivers of regeneration, which has significant potential to uncover sex-specific  
7 therapeutic targets to promote HST recovery.

8

## 9 **Methods:**

10 **Animals:** Animals were housed in the AAALAC accredited facilities of the CWRU School of  
11 Medicine. Husbandry and experimental procedures were approved by the Case Western  
12 Reserve University Institutional Animal Care and Use Committee (IACUC) in accordance with  
13 approved IACUC protocol 2019-0065. Steady-state and transplantation analyses were  
14 performed on 8wk old female C57BL/6J mice obtained from Jackson Laboratories. B6.SJL-  
15 Ptp<sup>prca</sup> Pep<sup>pcb</sup>/BoyJ and splenectomized C57BL/6 mice were obtained from Jackson  
16 Laboratories. All animals were observed daily for signs of illness. Mice were housed in standard  
17 microisolator cages and maintained on a defined, irradiated diet and autoclaved water.

18

19 **Complete Blood Count Analysis:** Peripheral blood was collected into Microtainer EDTA tubes  
20 (Becton-Dickinson) by submandibular cheek puncture. Blood counts were analyzed using a  
21 Hemavet 950 FS hematology analyzer.

22

1 **Colony Forming Analysis:** 5e4 total bone marrow cells and 2.5e5 total splenocytes were  
2 plated in Methocult media M3434 (StemCell Technologies) supplemented with hemin. CFU-GM  
3 and BFU-E colonies were scored 12 days post-plating.

4 **RNA Extraction, qPCR, and Bulk RNA Sequencing:** Total splenocytes and bone marrow cells  
5 were collected, lysed and RNA was extracted using the RNeasy MiniKit (QIAGEN) with on-  
6 column DNase treatment, according to the manufacturer's protocol. cDNA was synthesized  
7 using the PrimeScript RT Reagent Kit (Takara) following manufacturer's instructions. Real time  
8 PCR measurement was performed in a 20ul reaction containing 1ul cDNA template and a 1:20  
9 dilution of primer/probe with 1X Accuris Taq DNA polymerase. Samples were run on a CFX96  
10 optical module (Bio-Rad). Thermal cycling conditions were 95C for 3 minutes, followed by 50  
11 cycles of 95C for 15 seconds and 60C for 1 minute. Murine probe/primer sets for all genes  
12 assayed were obtained from Life Technologies. For each reverse transcription reaction, Cq  
13 values were determined as the average values obtained from three independent real-time PCR  
14 reactions. For RNAsequencing studies, samples were shipped on dry ice to MedGenome for  
15 subsequent library preparation and PE150 sequencing on Illumina (40M reads/sample). Data  
16 was analyzed in the Applied Functional Genomics core facility at CWRU. Microarray data is  
17 available at the NCBI GEO.

18

19 **Bone Marrow Transplantation:** Mice were exposed to 10Gy total body irradiation from a  
20 cesium source. 16-18hrs later, mice received 1e6 whole bone marrow cells by retroorbital  
21 injection.

22

23 **Quantification of HSPCs and Splenic Cell Types:** Bone marrow cells were obtained by  
24 flushing hindlimb bones and splenocytes were obtained by mincing spleens. Cellularity was

1 measured following red blood cell lysis. Cells were stained with antibodies against CD45R/B220  
2 (RA3-6B2), CD11b (M1/70), CD3e (500A2), Ly-6G and Ly6C (RB6-8C5), TER-119 (TER-119),  
3 CD117 (2B8), F4/80 (Cl:A3-1), Sca1 (D7), c-kit (2B8), CD150 (TC15-12F12.1), CD48 (HM48-1),  
4 and data was acquired on an LSRII flow cytometer (BD Biosciences). Analysis was performed  
5 on FlowJo software (TreeStar).

6

7 **Bone Marrow Cultures:** Total BM was flushed from male and female mice, and 5M cells were  
8 plated in RPMI 1640 media containing 2% FBS (charcoal stripped), 100ng/mL Thpo, 50ng/mL  
9 SCF, and 100ng/mL Flt3. E2 and T (Sigma) were supplemented into cultures at 3, 30, and 300  
10 pg/mL and cultures were harvested for HSPC quantification 5 days post plating.

11

12 **Statistical Analysis:** All values were tabulated graphically with error bars corresponding to  
13 standard error of the means. Analysis was performed using GraphPad Prism software. Unpaired  
14 two-tailed Student's t-test was used to compare groups, unless otherwise noted. For peripheral  
15 blood recovery kinetic analysis, 2-way ANOVA was used.

16

## 17 **Results:**

### 18 **Male and female C57BL/6 mice exhibit minor homeostatic differences in BM and splenic** 19 **hematopoiesis**

20 To first identify potential sex-specific differences in the cellular composition of the three major  
21 hematopoietic tissues, we characterized the peripheral blood, BM, and splenic compartments of  
22 young (8–10-week-old) male and female C57/Bl6 mice at steady state. At homeostasis we  
23 observe no significant differences in peripheral blood outside of a moderate but insignificant  
24 increase in male neutrophil counts, and no differences between white blood cells, lymphocytes,  
25 red blood cells, and platelets. In the bone marrow we observed minor differences in composition

1 as male mice demonstrated a trend towards increased total cellularity (23M cells/hindlimb vs.  
2 20M cells/hindlimb), a significant increase in the total number of lineage (-), Sca-1(+), c-Kit(+)  
3 LSK cells (49k/hindlimb vs. 33k/hindlimb), and a notably but statistically insignificant reduction in  
4 the number of long-term (LT)- HSC, as marked by LSK/CD150+/CD48(-), (1600/hindlimb vs.  
5 2200/hindlimb). Importantly, these differences were not likely due to the increased size of the  
6 BM compartment in male mice, as LSK frequencies were also higher in males (**Supplemental**  
7 **Figure 1**). In the spleen we observed no significant differences in splenic cellularity or LSK  
8 populations (**Figure 1A-C**). Additional measures of colony forming capacity within the BM and  
9 splenic compartments demonstrate no difference in the output of burst forming-erythroid or  
10 granulocyte-macrophage colonies between male and female mice (**Figure 1D**). Together, these  
11 data indicate that male and female mice exhibit generally similar hematopoietic activity and  
12 peripheral blood cell output at steady-state.

13

#### 14 **The hematopoietic microenvironments of male and female mice uniquely express** 15 **hematopoietic niche factors**

16 Given the difference in phenotypic HSPCs we identified at homeostasis, we performed real-time  
17 PCR on total BM and splenic RNA from age-matched young male and female animals to  
18 evaluate differentially expressed with the hematopoietic niche<sup>7</sup> genes. Notably in the BM we  
19 found expression differences in males as compared to females, including an increase in *Il6* (2.5-  
20 fold) coupled with decreases in *Vcam1*<sup>8</sup> (0.36-fold), *Cxcl12*<sup>9</sup> (0.19-fold), and *Notch*<sup>10</sup> factors  
21 (0.17-fold for *Notch1*). The reduction in *Vcam1* and *Cxcl12*, which are associated with HSPC  
22 retention in the niche<sup>11 12 13</sup>, coupled with decreased Notch signaling (which has been  
23 implicated in maintenance of HSC quiescence<sup>14</sup>), suggests the male BM microenvironment is  
24 primed for proliferation. Additionally, *Il6* has been shown both to enhance the myeloid  
25 differentiation of HSPCs<sup>15</sup>, and to promote IL-3 induced hematopoietic proliferation and  
26 increased HSC production<sup>16</sup>, thus also promoting a more active HSC microenvironment. In the

1 spleen we observed additional significant differences including increased male *Pf4*<sup>17</sup> (5.4-fold),  
2 *Angpt1*<sup>18</sup> (2.6-fold), and *Notch1* (3.2-fold), coupled with decreased male *KitL*<sup>19</sup> (0.46-fold) and  
3 *Vcam1* (0.34-fold) expression. (Figure 2). Thus, contrary to the signature observed in the BM,  
4 the significant increases in *Pf4*, *Angpt1*, and *Notch1* suggests that the male spleen exists in a  
5 more quiescent state compared to female counterparts. The existence of opposing signatures  
6 within the splenic and BM microenvironment is intriguing and in line with previous work  
7 identifying differential roles for each organ in HSC maintenance. These data, however, advance  
8 our understanding of these anatomical differences by uncovering sex-dependent regulators  
9 within the two hematopoietic microenvironments.

10

### 11 **Male and female mice display comparable early rates of peripheral recovery following** 12 **syngeneic HST.**

13 To determine whether sex-dependent gene expression patterns are associated with functional  
14 differences, we characterized the kinetics of hematopoietic recovery following HST in syngeneic  
15 transplants of young female BM into young female recipients (F→F) and young male BM into  
16 young male recipients (M→M) (Figure 3A). Following lethal irradiation and transplantation of  
17 1e6 total BM cells, we assessed peripheral complete blood counts (CBCs) at Day (D) 7, 14, 21,  
18 and 28 post-transplant. We observed only minor changes in white blood cell (WBC) differentials  
19 through D21, with the only significant difference being increased female lymphocytes at D14,  
20 however we did observe striking increases in total WBC, lymphocytes, and neutrophils in male  
21 mice at D28 post HST. We quantified significantly higher red blood cell (RBC) counts in D7 male  
22 vs. female mice, however there were subsequently no significant differences at D14, 21 or 28.  
23 Finally, we observed transient differences in platelets at D21 and D28, with female mice  
24 displaying significantly higher counts at the former and males higher values at the latter  
25 timepoint. Taken together this data suggests that peripheral recovery during the first 21 days



1 post HST is comparable between sexes, with recovery curves starting to diverge towards a  
2 male advantage by D28 (**Figure 3B**).

3

#### 4 **Male mice display accelerated medullary and extramedullary hematopoietic recovery** 5 **following HST**

6 Because the M→M HST setting demonstrated exuberant myeloid and lymphoid hematopoietic  
7 recovery, we next evaluated the kinetics of BM recovery. We observed a significantly  
8 accelerated recovery of the M→M cohort compared to the F→F mice in terms of total BM  
9 cellularity, with cellularity curves beginning to deviate at the D14 (20M cells/hindlimb vs. 17M)  
10 timepoint, through D21 (30M cells/hindlimb vs. 20M) and D28 (39M cells/hindlimb vs. 33M) post  
11 HST. This was also true for the absolute number of BM LSK cells with the male cohort  
12 containing significantly higher numbers of LSK cells at D14 (21K/hindlimb vs. 2K) and D21  
13 (35K/hindlimb vs. 19K), and LT-HSC numbers- with the male cohort containing higher LT-HSC  
14 numbers at D14 (650/hindlimb vs. 150), D21 (1750/hindlimb vs. 1250) and D28 (2200 vs. 1050),  
15 (**Figure 4B**). Quantification of differentiated cell populations in the BM demonstrated no  
16 significant differences in B-cells (as marked by B220+) or T-cells (as marked by CD3e+),  
17 however we did observe a significant increase in the number of BM macrophages in male mice  
18 (as marked by F480+) at D21 (2.1M vs. 0.83M) and D28 (1.82M vs. 1.24M) (**Figure 4C**). We  
19 additionally performed bulk RNA sequencing on total RNA isolated from the BM and spleens of  
20 D14 post HST animals (30M paired end reads, MedGenome). Interestingly, in the bone marrow  
21 we saw sex differences between many genes associated with hematopoiesis and regeneration,  
22 including downregulation of *Epas1* whose inhibition has been shown to promote tissue  
23 regeneration<sup>20</sup>, and *Ptn*, which has been shown to promote HSC quiescence following  
24 myeloablation<sup>21</sup>), in male compared to female recipients. Differential expression of these genes  
25 is consistent with the transient increase in HSPCs we observed in M→M HST. Additionally, we

1 found concomitant increases in *Ms4a3* (suggesting enhanced regeneration of the granulocyte-  
2 monocyte progenitor population <sup>22</sup>), *Fpr2* (which may promote granulocyte recovery <sup>23</sup>), *Il1r2*  
3 (potentially promoting myeloid cell proliferation <sup>24</sup>), *Ccr1* and *Hdc* (which can promote myeloid  
4 progenitor cell proliferation <sup>25 26</sup>), and *Ms4a4c* and *Gsr* (potentially promoting alternative  
5 activation of macrophages to reduce inflammation in the post HST microenvironment <sup>27 28</sup>)  
6 **(Figure 4D).**

7

8 The splenic compartment also showed robust recovery advantages in the M→M cohort  
9 compared to F→F as evidenced by significant increases in total cellularity at D7 (37.6M/mouse  
10 vs. 12.7M), D14 (47M/mouse vs. 29.3M), D21 (79.5M/mouse vs. 50.4M), and  
11 D28(70.9M/mouse vs. 46.2M). We also observed significant increases in the LSK population at  
12 D7 (132K vs. 45K), D14 (60.6K vs. 15K), and D21(100K vs. 32.6K) **(Figure 5B)**. Recovery of  
13 the B, T, and macrophage populations in the spleens of M→M vs. F→F mice was dramatically  
14 different, with M→M mice displaying higher numbers of B-cells particularly at D21 (5.2M/spleen  
15 vs. 3M) and D28 (3.9M/spleen vs. 2.1M), and macrophages at each timepoint, particularly the  
16 D21 (3.8M/spleen vs. 1.8M) and D28 ( 3.2M/spleen vs. 1.7M) **(Figure 5C)**. RNA sequencing  
17 results also demonstrate splenic sex differences between genes associated with hematopoietic  
18 regeneration including downregulation of *Cfh* (potentially reducing splenic inflammation and  
19 autoimmunity <sup>29</sup>), *Ptprd* (inhibition of Ptp has been demonstrated to promote regeneration <sup>30</sup>),  
20 *Cxcl12* (suggesting enhanced HSC mobilization), *Epas1*(also observed in the BM, which may  
21 promote regeneration), *Lepr* (which marks long-term HSCs <sup>31</sup>), and *Malat1* (which is  
22 downregulated upon hematopoietic differentiation <sup>32</sup>) in male compared to female recipients  
23 **(Figure 5D).**

24

1 **The male microenvironment drives hematopoietic recovery independent of HSC donor**  
2 **sex**

3 To distinguish the roles of donor HSCs vs. the recipient microenvironment in contributing to the  
4 sexual dimorphism of HST regeneration, we established mismatch transplants with each  
5 combination of donor versus recipient (M→M, M→F, F→M, F→F). We sacrificed these cohorts  
6 at D14 post HST, as this marked a time point when HSCs and HSPCs exhibited sex-dependent  
7 recovery differences that preceded effects on mature cell types, and characterized the HSPC  
8 population in the BM and splenic microenvironments. Notably, we observed that F→M mice,  
9 which consisted of female donor BM transplanted into a male recipient, recovered at an  
10 accelerated pace compared to M→F mice, which consisted of male donor BM transplanted into  
11 a female recipient, and that the male microenvironment was generally sufficient to recapitulate  
12 the enhanced recovery observed in the M→M scenario. This included significant increases in  
13 BM cellularity (20.3M/mouse vs. 17.4M) and trends toward increased BM LSK (19.5K/mouse vs.  
14 11.4K/mouse) and LT-HSC (288/mouse vs. 100) numbers). In the spleen we observed that the  
15 F→M group also displayed accelerated recovery compared to M→F mice as shown by  
16 increased D14 splenic cellularity (34.3M/mouse vs. 25.3M) and LSK (67.3K/mouse vs. 26.5K)  
17 numbers (**Figure 6**). This data suggests that the male microenvironment is responsible for the  
18 accelerated recovery post HST, and that this phenotype is independent of donor cell sex.

19  
20 **Estradiol supplementation to BM cultures significantly increases long-term HSCs**

21 We next sought to elucidate a potential role for sex hormones in mediating our observed  
22 differences in steady state composition and post-transplant regeneration rates between male  
23 and female mice. Coviello *et. al* have previously demonstrated that male patients receiving  
24 weekly doses of testosterone (T) display a dose dependent stimulation of erythropoiesis and  
25 that this stimulation is more pronounced in elderly males<sup>33 34</sup>. This data suggests that

1 testosterone yields a lineage specific hematopoietic burst that results in an expansion of  
2 erythroid populations. Multiple groups have also demonstrated a role for 17 $\beta$  estradiol (E2) in  
3 HSC regulation. Illing *et. al*/ published that E2 administration to mice resulted in increased HSC  
4 numbers in the vascular (but not endosteal) hematopoietic niche by increasing HSC cell cycle  
5 entry<sup>35</sup>, and Nakada *et. al*/ subsequently showed that elevated E2 levels during pregnancy  
6 resulted in increased HSC division, HSC frequency, cellularity, and erythropoiesis in the spleen  
7<sup>4</sup>. Here we established cultures of total BM supplemented with increasing doses of either E2 or  
8 T (3pg/mL, 30pg/mL, 300pg/mL) and harvested these cultures at D5 following treatment.  
9 Assessment of the LSK and LT-HSC (SLAM) populations demonstrate that E2 supplementation  
10 to both male and female BM results in a significant decrease in the frequency of LSK cells.  
11 30pg/mL E2 resulted in ~2-fold decrease in LSK while 300pg/mL led to a ~3-fold decline.  
12 Surprisingly, this was coupled with significant increases in the frequency of SLAM cells in  
13 culture which suggests that sex steroids may alter the *ex vivo* proliferation and differentiation  
14 capacity of HSCs (**Figure 7**). We also demonstrated that this effect was specific to E2  
15 treatment, as T supplementation to BM cultures resulted in no significant alterations to either the  
16 LSK or SLAM compartments (**Supplemental Figure 2**).

17

## 18 **Discussion:**

19 Recent work studying sex-differences in hematopoiesis has elucidated an important role for sex  
20 in mediating (1) obesity induced inflammatory response- with males demonstrating enhanced  
21 myelopoiesis and inflammation during obesity<sup>36</sup>, (2) HSC self-renewal and proliferation  
22 capacity- with estrogen promoting HSC division, self-renewal capacity, and erythroid output<sup>4</sup>,  
23 (3) aging hematopoiesis- with male HSCs exhibiting an earlier phenotypic and functional decline  
24 than females<sup>37</sup>, (4) incidence of infectious and autoimmune diseases - with more robust  
25 interferon responses and altered macrophage gene expression in females proposed as being

1 causative<sup>38</sup>. Further understanding the role of sex in additional aspects of hematopoiesis is  
2 warranted- particularly as sexual dimorphism has been demonstrated as an important player in  
3 pathogenesis and treatment options for a number of diseases including many cancers<sup>39 40</sup>,  
4 diabetes<sup>41</sup>, cardiovascular disease<sup>42</sup>, and others.

5

6 In this manuscript we begin to both phenotypically and mechanistically characterize sexual  
7 dimorphism associated with steady state and regenerative hematopoiesis. In particular we  
8 identified (1) that male mice at steady state contain an increased number of LSK cells and trend  
9 towards reduced LT-HSCs, (2) that steady state male and female mice uniquely express factors  
10 critical to the hematopoietic niche, with males demonstrating a BM signature consistent with  
11 increased HSC production and proliferation, (3) that these gene expression signatures correlate  
12 with accelerated medullary and extra-medullary recovery upon syngeneic transplantation of  
13 male donor cells into male recipients compared to female donor cells into female recipients, (4)  
14 that the male microenvironment is responsible for this observed accelerated recovery, as female  
15 donor BM transplanted into male recipients recovered post HST faster than male BM  
16 transplanted into female recipients, and (5) that E2 supplementation to BM cultures reduces the  
17 frequency of LSK cells but significantly increases frequencies of long-term SLAM cells.

18

19 We thus hypothesize that sex-specific cellular and molecular signaling occurs during  
20 hematopoietic regeneration. We also implicate steroid sex hormones in determining  
21 regeneration rates and propose that E2 promotes long-term HSC populations at the expense of  
22 the more differentiated short-term LSK cells. This may help explain our data from **Figures 4 and**  
23 **5**, if we hypothesize that increased E2 production in females during HST limits LT-HSC  
24 proliferation and progenitor differentiation, thus restricting early hematologic recovery in female

1 versus male recipients. On the other hand, we expect that this effect of E2 on LT-HSCs will  
2 provide long-term advantages over the lifetime of the recipient. This hypothesis is intriguing and  
3 requires further study.

4

5 This work has also uncovered additional questions that require further study, including:

- 6 - What are the unique sex-specific roles of the donor HSCs versus recipient stromal cells on  
7 hematopoietic engraftment, proliferation, and long term maintenance following HST?
- 8 - What are the sex-dependent genetic and phenotypic differences in hematopoietic  
9 regeneration following myeloablation?
- 10 - What roles do steroid sex hormones play on transplantation outcomes?
- 11 - Whether steroid sex hormone differences underlie the differential expression of HSC niche  
12 genes in the BM and spleen.

13

14 Elucidating additional sex-specific mechanisms of regenerative hematopoiesis has implications  
15 for the approximately ~25,000 HST are performed each year in the United States to treat  
16 conditions including plasma cell dyscrasias, non-Hodgkin's lymphoma, acute myeloid leukemia,  
17 myelodysplastic syndromes, and acute lymphocytic leukemia. While HST is curative in many  
18 settings and capable of significantly extending survival in others, the severe complications  
19 associated with the procedure have limited its utility and narrowed the potential patient pool<sup>43,44</sup>.  
20 By deepening our understanding of factors regulating hematopoiesis and hematopoietic stem  
21 cell function, we have enormous potential to expand the utility of HST.

22

23 **Acknowledgments**

1 This work was supported by NIH grants R00 HL135740, R01 HL158801-01, T32 EB005583,  
2 and by the Radiation Resources Core Facility, the Hematopoietic Biorepository and Cellular  
3 Therapy Core Facility, the Applied Functional Genomics Core, and the Cytometry & Imaging  
4 Microscopy Core Facility of the Case Comprehensive Cancer Center (P30CA043703). This  
5 work was also supported by a generous award from the Ohio Cancer Research Foundation.

6

## 7 **Author Contributions**

8 Julianne N.P. Smith: Conception and design, Data collection/interpretation, Manuscript editing

9 Brittany A. Cordova: Data collection/interpretation

10 Brian Richardson: Data interpretation

11 Kelsey F. Christo: Data collection

12 Jordan Campanelli: Data collection/interpretation

13 Alyssia V. Broncano: Data collection

14 Jonathan Chen: Data collection

15 Juyeun Lee: Data interpretation, Manuscript editing

16 Scott J. Cameron: Data interpretation, Manuscript editing

17 Justin D. Lathia: Data interpretation, Manuscript editing

18 Wendy A. Goodman: Data collection/interpretation, Manuscript editing

19 Mark J. Cameron: Data interpretation, Manuscript editing

20 Amar B. Desai: Conception and design, Data collection/interpretation, manuscript writing, Final  
21 approval of manuscript

22

## 23 **Conflict of Interest Disclosures:**

24 The authors have no conflicts of interest to declare.

25

26

## 1   **References:**

- 2    1.     Kim HT, Zhang MJ, Woolfrey AE, et al. Donor and recipient sex in allogeneic stem cell  
3    transplantation: what really matters. *Haematologica*. Oct 2016;101(10):1260-1266.  
4    doi:10.3324/haematol.2016.147645
- 5    2.     Anasetti C. What are the most important donor and recipient factors affecting the  
6    outcome of related and unrelated allogeneic transplantation? *Best Pract Res Clin Haematol*.  
7    Dec 2008;21(4):691-7. doi:10.1016/j.beha.2008.10.002
- 8    3.     Topel ML, Hayek SS, Ko YA, et al. Sex Differences in Circulating Progenitor Cells. *J Am*  
9    *Heart Assoc*. Oct 3 2017;6(10)doi:10.1161/JAHA.117.006245
- 10   4.     Nakada D, Oguro H, Levi BP, et al. Oestrogen increases haematopoietic stem-cell self-  
11   renewal in females and during pregnancy. *Nature*. Jan 23 2014;505(7484):555-8.  
12   doi:10.1038/nature12932
- 13   5.     Mierzejewska K, Borkowska S, Suszynska E, et al. Hematopoietic stem/progenitor cells  
14   express several functional sex hormone receptors-novel evidence for a potential developmental  
15   link between hematopoiesis and primordial germ cells. *Stem Cells Dev*. Apr 15 2015;24(8):927-  
16   37. doi:10.1089/scd.2014.0546
- 17   6.     Smith JN, Dawson DM, Christo KF, et al. 15-PGDH inhibition activates the splenic niche  
18   to promote hematopoietic regeneration. *JCI Insight*. Mar 22  
19   2021;6(6)doi:10.1172/jci.insight.143658
- 20   7.     Pinho S, Frenette PS. Haematopoietic stem cell activity and interactions with the niche.  
21   *Nat Rev Mol Cell Biol*. May 2019;20(5):303-320. doi:10.1038/s41580-019-0103-9
- 22   8.     Ulyanova T, Scott LM, Priestley GV, et al. VCAM-1 expression in adult hematopoietic  
23   and nonhematopoietic cells is controlled by tissue-inductive signals and reflects their  
24   developmental origin. *Blood*. Jul 1 2005;106(1):86-94. doi:10.1182/blood-2004-09-3417
- 25   9.     Sugiyama T, Kohara H, Noda M, Nagasawa T. Maintenance of the hematopoietic stem  
26   cell pool by CXCL12-CXCR4 chemokine signaling in bone marrow stromal cell niches.  
27   *Immunity*. Dec 2006;25(6):977-88.
- 28   10.    Bigas A, D'Altri T, Espinosa L. The Notch pathway in hematopoietic stem cells. *Curr Top*  
29   *Microbiol Immunol*. 2012;360:1-18. doi:10.1007/82\_2012\_229
- 30   11.    Dutta P, Hoyer FF, Grigoryeva LS, et al. Macrophages retain hematopoietic stem cells in  
31   the spleen via VCAM-1. *J Exp Med*. Apr 6 2015;212(4):497-512. doi:10.1084/jem.20141642
- 32   12.    Greenbaum A, Hsu YM, Day RB, et al. CXCL12 in early mesenchymal progenitors is  
33   required for haematopoietic stem-cell maintenance. *Nature*. Mar 14 495(7440):227-30.
- 34   13.    Levesque JP, Hendy J, Takamatsu Y, Simmons PJ, Bendall LJ. Disruption of the  
35   CXCR4/CXCL12 chemotactic interaction during hematopoietic stem cell mobilization induced by  
36   GCSF or cyclophosphamide. *J Clin Invest*. Jan 2003;111(2):187-96. doi:10.1172/JCI15994
- 37   14.    Wang W, Yu S, Zimmerman G, et al. Notch Receptor-Ligand Engagement Maintains  
38   Hematopoietic Stem Cell Quiescence and Niche Retention. *Stem Cells*. Jul 2015;33(7):2280-93.  
39   doi:10.1002/stem.2031
- 40   15.    Zhao JL, Ma C, O'Connell RM, et al. Conversion of danger signals into cytokine signals  
41   by hematopoietic stem and progenitor cells for regulation of stress-induced hematopoiesis. *Cell*  
42   *Stem Cell*. Apr 3 2014;14(4):445-459. doi:10.1016/j.stem.2014.01.007
- 43   16.    Tie R, Li H, Cai S, et al. Interleukin-6 signaling regulates hematopoietic stem cell  
44   emergence. *Exp Mol Med*. Oct 24 2019;51(10):1-12. doi:10.1038/s12276-019-0320-5
- 45   17.    Bruns I, Lucas D, Pinho S, et al. Megakaryocytes regulate hematopoietic stem cell  
46   quiescence through CXCL4 secretion. *Nat Med*. Nov 20(11):1315-20.
- 47   18.    Zhou BO, Ding L, Morrison SJ. Hematopoietic stem and progenitor cells regulate the  
48   regeneration of their niche by secreting Angiopoietin-1. *Elife*. Mar 30 2015;4:e05521.  
49   doi:10.7554/eLife.05521



- 1 19. Lapidot T, Dar A, Kollet O. How do stem cells find their way home? *Blood*. Sep 15  
2 2005;106(6):1901-10. doi:10.1182/blood-2005-04-1417
- 3 20. Xie L, Yin A, Nichenko AS, Beedle AM, Call JA, Yin H. Transient HIF2A inhibition  
4 promotes satellite cell proliferation and muscle regeneration. *J Clin Invest*. Jun 1  
5 2018;128(6):2339-2355. doi:10.1172/JCI96208
- 6 21. Himburg HA, Yan X, Doan PL, et al. Pleiotrophin mediates hematopoietic regeneration  
7 via activation of RAS. *J Clin Invest*. Nov 2014;124(11):4753-8. doi:10.1172/JCI76838
- 8 22. Liu Z, Gu Y, Chakarov S, et al. Fate Mapping via Ms4a3-Expression History Traces  
9 Monocyte-Derived Cells. *Cell*. Sep 5 2019;178(6):1509-1525 e19.  
10 doi:10.1016/j.cell.2019.08.009
- 11 23. Barbosa CMV, Fock RA, Hastreiter AA, et al. Extracellular annexin-A1 promotes  
12 myeloid/granulocytic differentiation of hematopoietic stem/progenitor cells via the Ca(2+)/MAPK  
13 signalling transduction pathway. *Cell Death Discov*. 2019;5:135. doi:10.1038/s41420-019-0215-  
14 1
- 15 24. Pietras EM, Mirantes-Barbeito C, Fong S, et al. Chronic interleukin-1 exposure drives  
16 haematopoietic stem cells towards precocious myeloid differentiation at the expense of self-  
17 renewal. *Nat Cell Biol*. Jun 2016;18(6):607-18. doi:10.1038/ncb3346
- 18 25. Broxmeyer HE, Cooper S, Hangoc G, Gao JL, Murphy PM. Dominant myelopoietic  
19 effector functions mediated by chemokine receptor CCR1. *J Exp Med*. Jun 21  
20 1999;189(12):1987-92. doi:10.1084/jem.189.12.1987
- 21 26. Chen X, Deng H, Churchill MJ, et al. Bone Marrow Myeloid Cells Regulate Myeloid-  
22 Biased Hematopoietic Stem Cells via a Histamine-Dependent Feedback Loop. *Cell Stem Cell*.  
23 Dec 7 2017;21(6):747-760 e7. doi:10.1016/j.stem.2017.11.003
- 24 27. Sanyal R, Polyak MJ, Zuccolo J, et al. MS4A4A: a novel cell surface marker for M2  
25 macrophages and plasma cells. *Immunol Cell Biol*. Aug 2017;95(7):611-619.  
26 doi:10.1038/icb.2017.18
- 27 28. Hu L, Zhang Y, Miao W, Cheng T. Reactive Oxygen Species and Nrf2: Functional and  
28 Transcriptional Regulators of Hematopoiesis. *Oxid Med Cell Longev*. 2019;2019:5153268.  
29 doi:10.1155/2019/5153268
- 30 29. Kiss MG, Ozsvar-Kozma M, Porsch F, et al. Complement Factor H Modulates Splenic B  
31 Cell Development and Limits Autoantibody Production. *Front Immunol*. 2019;10:1607.  
32 doi:10.3389/fimmu.2019.01607
- 33 30. Zhang Y, Roos M, Himburg H, et al. PTPsigma inhibitors promote hematopoietic stem  
34 cell regeneration. *Nat Commun*. Aug 14 2019;10(1):3667. doi:10.1038/s41467-019-11490-5
- 35 31. Trinh T, Ropa J, Aljoufi A, et al. Leptin receptor, a surface marker for a subset of highly  
36 engrafting long-term functional hematopoietic stem cells. *Leukemia*. Jul 2021;35(7):2064-2075.  
37 doi:10.1038/s41375-020-01079-z
- 38 32. Ma XY, Wang JH, Wang JL, Ma CX, Wang XC, Liu FS. Malat1 as an evolutionarily  
39 conserved lncRNA, plays a positive role in regulating proliferation and maintaining  
40 undifferentiated status of early-stage hematopoietic cells. *BMC Genomics*. Sep 3 2015;16:676.  
41 doi:10.1186/s12864-015-1881-x
- 42 33. Coviello AD, Kaplan B, Lakshman KM, Chen T, Singh AB, Bhasin S. Effects of graded  
43 doses of testosterone on erythropoiesis in healthy young and older men. *J Clin Endocrinol*  
44 *Metab*. Mar 2008;93(3):914-9. doi:10.1210/jc.2007-1692
- 45 34. Maggio M, Snyder PJ, Ceda GP, et al. Is the haematopoietic effect of testosterone  
46 mediated by erythropoietin? The results of a clinical trial in older men. *Andrology*. Jan  
47 2013;1(1):24-8. doi:10.1111/j.2047-2927.2012.00009.x
- 48 35. Illing A, Liu P, Ostermay S, et al. Estradiol increases hematopoietic stem and progenitor  
49 cells independent of its actions on bone. *Haematologica*. Aug 2012;97(8):1131-5.  
50 doi:10.3324/haematol.2011.052456

- 1 36. Singer K, Maley N, Mergian T, et al. Differences in Hematopoietic Stem Cells Contribute  
2 to Sexually Dimorphic Inflammatory Responses to High Fat Diet-induced Obesity. *J Biol Chem.*  
3 May 22 2015;290(21):13250-62. doi:10.1074/jbc.M114.634568
- 4 37. So EY, Jeong EM, Wu KQ, et al. Sexual dimorphism in aging hematopoiesis: an earlier  
5 decline of hematopoietic stem and progenitor cells in male than female mice. *Aging (Albany*  
6 *NY).* Dec 9 2020;12(24):25939-25955. doi:10.18632/aging.202167
- 7 38. Gal-Oz ST, Maier B, Yoshida H, et al. ImmGen report: sexual dimorphism in the immune  
8 system transcriptome. *Nat Commun.* Sep 20 2019;10(1):4295. doi:10.1038/s41467-019-12348-  
9 6
- 10 39. Clocchiatti A, Cora E, Zhang Y, Dotto GP. Sexual dimorphism in cancer. *Nat Rev*  
11 *Cancer.* May 2016;16(5):330-9. doi:10.1038/nrc.2016.30
- 12 40. Rubin JB, Lagas JS, Broestl L, et al. Sex differences in cancer mechanisms. *Biol Sex*  
13 *Differ.* Apr 15 2020;11(1):17. doi:10.1186/s13293-020-00291-x
- 14 41. Kautzky-Willer A, Harreiter J, Pacini G. Sex and Gender Differences in Risk,  
15 Pathophysiology and Complications of Type 2 Diabetes Mellitus. *Endocr Rev.* Jun  
16 2016;37(3):278-316. doi:10.1210/er.2015-1137
- 17 42. Peters SAE, Muntner P, Woodward M. Sex Differences in the Prevalence of, and Trends  
18 in, Cardiovascular Risk Factors, Treatment, and Control in the United States, 2001 to 2016.  
19 *Circulation.* Feb 19 2019;139(8):1025-1035. doi:10.1161/CIRCULATIONAHA.118.035550
- 20 43. Peffault de Latour R. Transplantation for bone marrow failure: current issues.  
21 *Hematology Am Soc Hematol Educ Program.* Dec 2 2016;2016(1):90-98.  
22 doi:10.1182/asheducation-2016.1.90
- 23 44. Inamoto Y, Lee SJ. Late effects of blood and marrow transplantation. *Haematologica.*  
24 Apr 2017;102(4):614-625. doi:10.3324/haematol.2016.150250

25  
26  
27  
28  
29  
30  
31  
32  
33  
34  
35  
36  
37  
38  
39

## 1 **Figure Legends**

2

3 **Figure 1: Male and female C57BL/6 mice exhibit minor homeostatic differences in BM and**  
4 **splenic hematopoiesis-** A. Complete blood count analysis of circulating white blood cells  
5 (WBC), lymphocytes (LYMPH), neutrophils (NE), red blood cells (RBC), and platelets (PLT) in  
6 steady-state female (F) and male (M) mice. B, C. Quantification of total nucleated bone marrow  
7 cells flushed per hindlimb and spleen, and immunophenotypic analysis of hematopoietic stem  
8 and progenitor cells (HSPCs; Lineage- Sca1+ c-Kit+ (LSK)), and hematopoietic stem cells  
9 (HSCs; LSK CD48- CD150+) per hindlimb and per spleen. N=15 mice/arm. D. Number of burst  
10 forming unit-erythroid (BFU-E) and colony forming unit-granulocyte-macrophage (CFU-GM) in  
11 the marrow and spleen of male and female mice. N=6 mice/arm. Error bars represent SEM. **\*\*P**  
12 **< 0.01.** Student's t-test used for all analyses.

13

14 **Figure 2: The hematopoietic microenvironments of male and female mice uniquely**  
15 **express hematopoietic niche factors-** Fold-change of indicated genes in total BM and splenic  
16 RNA preps from male (purple) over female (gray) mice, normalized to *Actb*. N=5 mice/arm. Error  
17 bars represent SEM. **\*\*P < 0.01.** Student's t-test used for all analyses.

18

19 **Figure 3: Male and female mice display comparable early rates of peripheral recovery**  
20 **following syngeneic HST-** Schematic depicting transplant conditions. 1e6 BM cells from male  
21 donors were transplanted into lethally irradiated (10Gy) male recipients, and the equivalent  
22 performed using female donors and recipients. B. Complete blood count analysis of circulating  
23 white blood cells (WBC) lymphocytes (LYMPH), neutrophils (NE), red blood cells (RBC), and  
24 platelets (PLT) in male (purple) and female (gray) mice at indicated time points post-bone  
25 marrow transplantation. N=5 mice/arm for D7, D21 and D28, N=10 mice/arm for D14. Error bars  
26 represent SEM. Welch's T-Test performed at each timepoint.

27

28 **Figure 4: Male mice display accelerated medullary hematopoietic recovery following**  
29 **HST-** A. Schematic depicting transplant conditions. B. BM cellularity, and quantification of  
30 lineage-cKit+Sca1+ (LSK) and LSK CD150+CD48- (LT-HSC) was obtained on cohorts of mice  
31 sacrificed on Days 7, 14, 21, and 28 post transplant. N=5 mice/arm for D7 and D28, N=10  
32 mice/arm for D14, D21. C. Quantification of BM B-cells (B220+), T-cells (CD3e+), and  
33 Macrophages (F4/80+) on cohorts described in B. N=5 mice/arm for D7 and D28, N=10  
34 mice/arm for D14, D21. N=5 mice/arm for Macrophages. Error bars represent SEM. 2-way  
35 ANOVA was performed and asterisks denote male vs. female. D. Heat map generated from bulk  
36 RNA sequencing on total BM populations of D14 post HST mice. Top 50 differentially expressed  
37 genes ranked by p-value. N=5 mice/arm.

38

39 **Figure 5: Male mice exhibit robust splenic extramedullary hematopoiesis post-transplant-**  
40 A. Schematic depicting transplant conditions. B. Splenic cellularity, and quantification of lineage-  
41 cKit+Sca1+ (LSK) and LSK CD150+CD48- (LT-HSC) was obtained on cohorts of mice

1 sacrificed on Days 7, 14, 21, and 28 post transplant. C. Quantification of splenic B-cells  
2 (B220+), T-cells (CD3e+), and Macrophages (F4/80+) on cohorts described in B. N=5 mice/arm  
3 for D7 and D28, N=10 mice/arm for D14, D21. N=5 mice/arm for Macrophages. Error bars  
4 represent SEM. 2-way ANOVA was performed and asterisks denote male vs. female. D. Heat  
5 map generated from bulk RNA sequencing on total BM populations of D14 post HST mice. Top  
6 50 differentially expressed genes ranked by p-value. N=5 mice/arm.

7

8 **Figure 6: The male microenvironment drives hematopoietic recovery independent of**  
9 **donor HSC sex** - A. Schematic depicting transplant conditions. 1e6 BM cells from male donors  
10 were transplanted into lethally irradiated (10Gy) female recipients, and the equivalent performed  
11 using female donors and male recipients. B. BM and splenic cellularity, and quantification of  
12 lineage-cKit+Sca1+ (LSK) and LSK CD150+CD48- (LT-HSC) was obtained from mice sacrificed  
13 on Day 14 post transplant. N=10 mice/arm. Error bars represent SEM.  $**P < 0.01$ . Student's t-  
14 test used for all analyses.

15

16 **Figure 7: Estradiol supplementation to BM cultures significantly increases long-term**  
17 **HSCs**- A. Frequencies of lineage-cKit+Sca1+ (LSK) and LSK CD150+CD48- (LT-HSC)  
18 following 5 days of total male and female BM cultured with the indicated doses of Estradiol (E2).  
19 B. Representative flow cytometric plots depicting BM LSK and LT-HSC populations on Day 5  
20 cultures of BM only versus BM + 300 pg/mL E2. n=7 mice.arm. Error bars represent SEM.  $**P <$   
21  $0.01$ . Student's t-test used for all analyses and represent each experimental arm again  
22 untreated BM.

**Figure 1: Male and female C57BL/6 mice exhibit minor homeostatic differences in BM and splenic hematopoiesis**

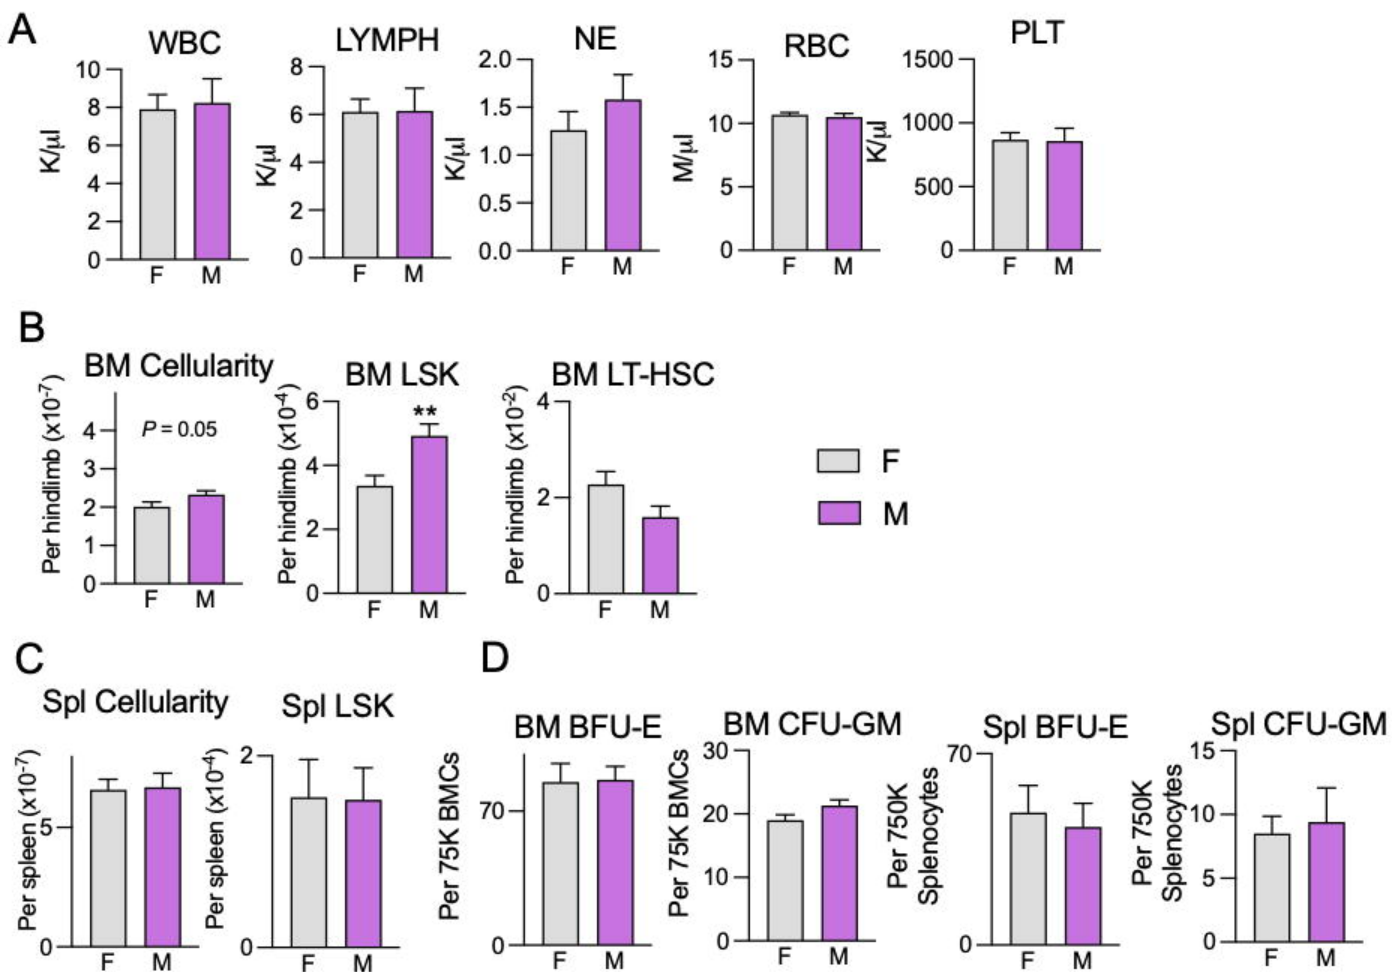

**Figure 1: A.** Complete blood count analysis of circulating white blood cells (WBC), lymphocytes (LYMPH), neutrophils (NE), red blood cells (RBC), and platelets (PLT) in steady-state female (F) and male (M) mice. **B, C.** Quantification of total nucleated bone marrow cells flushed per hindlimb and spleen, and immunophenotypic analysis of hematopoietic stem and progenitor cells (HSPCs; Lineage-Sca1+ c-Kit+ (LSK)), and hematopoietic stem cells (HSCs; LSK CD48- CD150+) per hindlimb and per spleen. N=15 mice/arm. **D.** Number of burst forming unit-erythroid (BFU-E) and colony forming unit-granulocyte-macrophage (CFU-GM) in the marrow and spleen of male and female mice. N=6 mice/arm. Error bars represent SEM. \*\* $P < 0.01$ . Student's t-test used for all analyses.



**Figure 2: The hematopoietic microenvironments of male and female mice uniquely express hematopoietic niche factors**

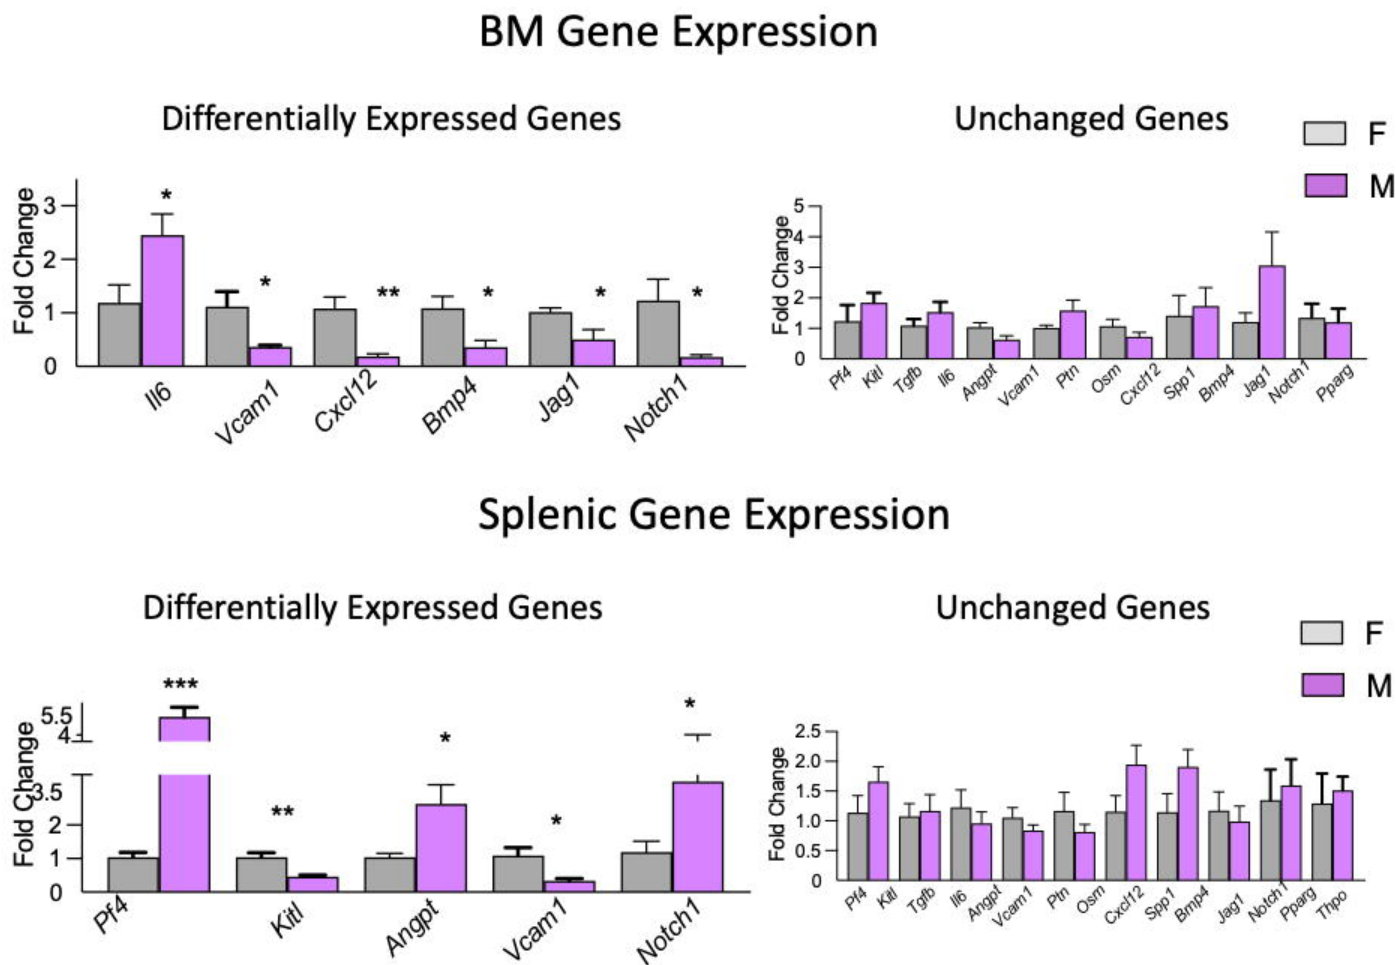

**Figure 2:** Fold-change of indicated genes in total BM and splenic RNA preps from male (purple) over female (gray) mice, normalized to *Actb*. N=5 mice/arm. Error bars represent SEM. \*\* $P < 0.01$ . Student's t-test used for all analyses.

**Figure 3: Male and female mice display comparable early rates of peripheral recovery following syngeneic HST**

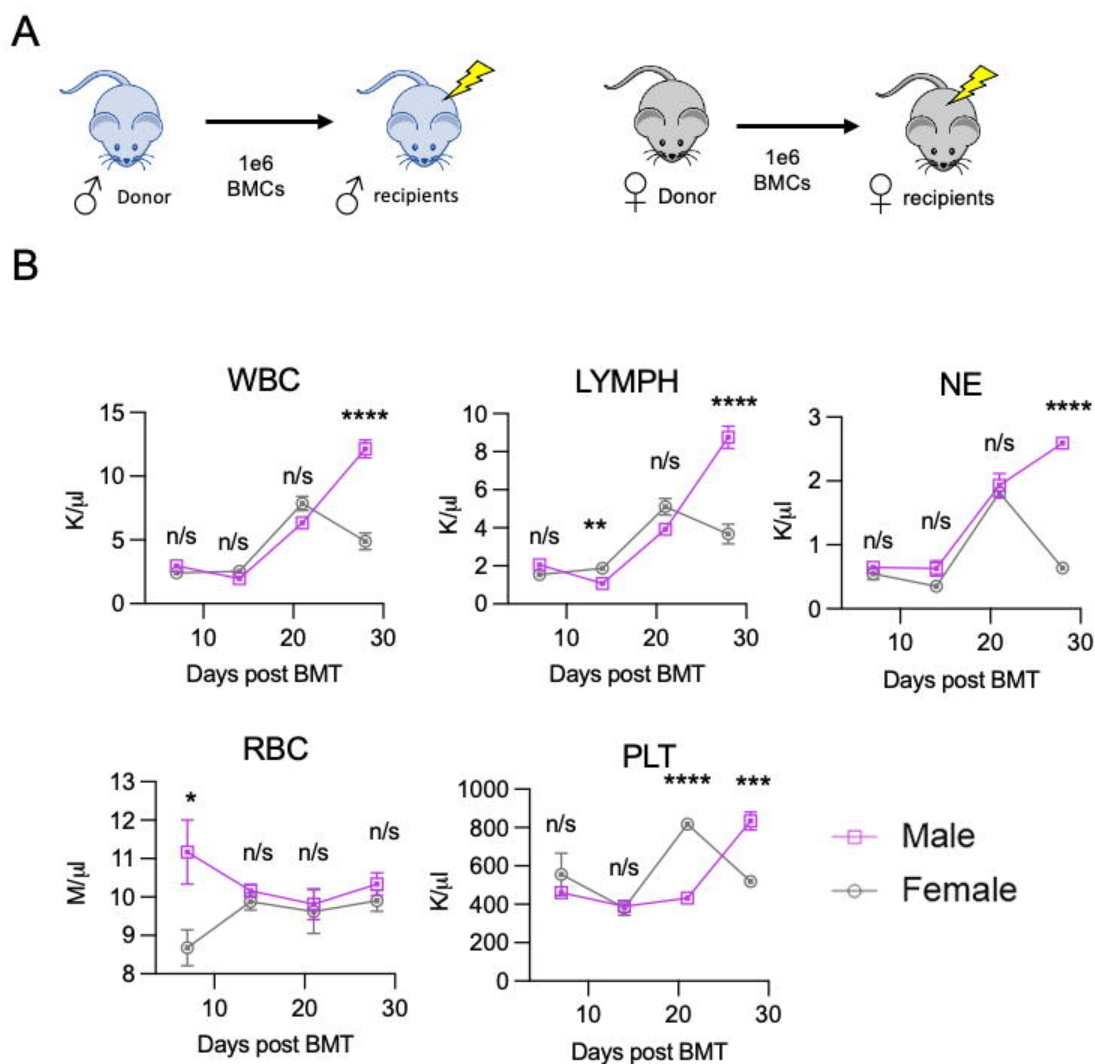

**Figure 3: A.** Schematic depicting transplant conditions. 1e6 BM cells from male donors were transplanted into lethally irradiated (10Gy) male recipients, and the equivalent performed using female donors and recipients. **B.** Complete blood count analysis of circulating white blood cells (WBC) lymphocytes (LYMPH), neutrophils (NE), red blood cells (RBC), and platelets (PLT) in male (purple) and female (gray) mice at indicated time points post-bone marrow transplantation. N=5 mice/arm for D7, D21 and D28, N=10 mice/arm for D14. Error bars represent SEM. Welch's T-Test performed at each timepoint.

# Figure 4: Male mice display accelerated medullary hematopoietic recovery following HST

**A**

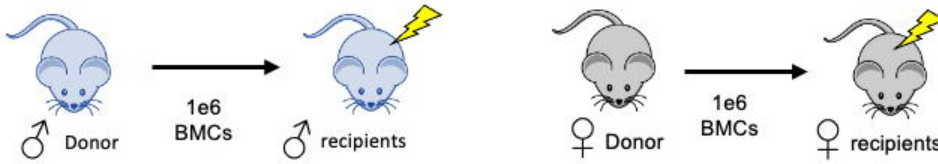

**B**

## BM Kinetic Recovery

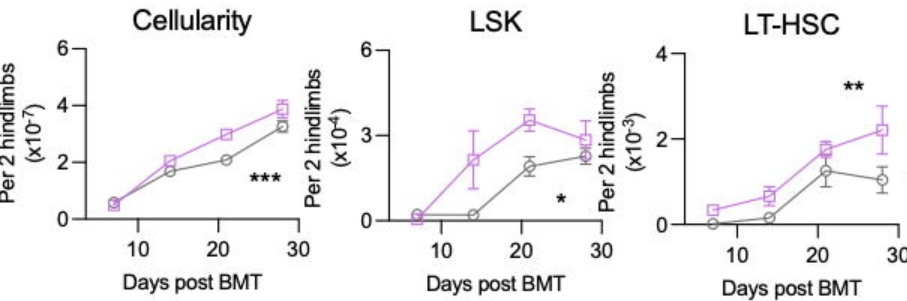

**C**

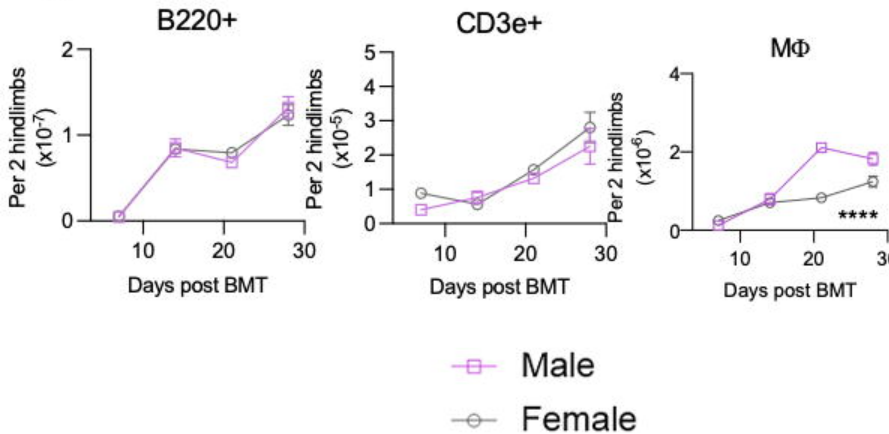

**D**

## Top 50 DEGs by P.Value Male BM Vs Female BM

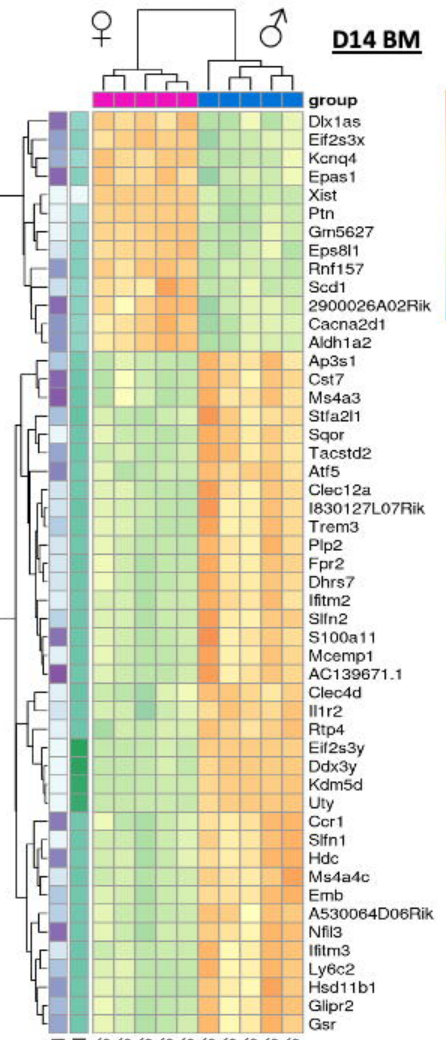

**Figure 4: A.** Schematic depicting transplant conditions. **B.** BM cellularity, and quantification of lineage-cKit+Sca1+ (LSK) and LSK CD150+CD48- (LT-HSC) was obtained on cohorts of mice sacrificed on Days 7, 14, 21, and 28 post transplant. N=5 mice/arm for D7 and D28, N=10 mice/arm for D14, D21. **C.** Quantification of BM B-cells (B220+), T-cells (CD3e+), and Macrophages (F4/80+) on cohorts described in B. N=5 mice/arm for D7 and D28, N=10 mice/arm for D14, D21. N=5 mice/arm for Macrophages. Error bars represent SEM. 2-way ANOVA was performed and asterisks denote male vs. female. **D.** Heat map generated from bulk RNA sequencing on total BM populations of D14 post HST mice. Top 50 differentially expressed genes ranked by p-value. N=5 mice/arm.



# Figure 5: Male mice exhibit robust splenic extramedullary hematopoiesis post-transplant

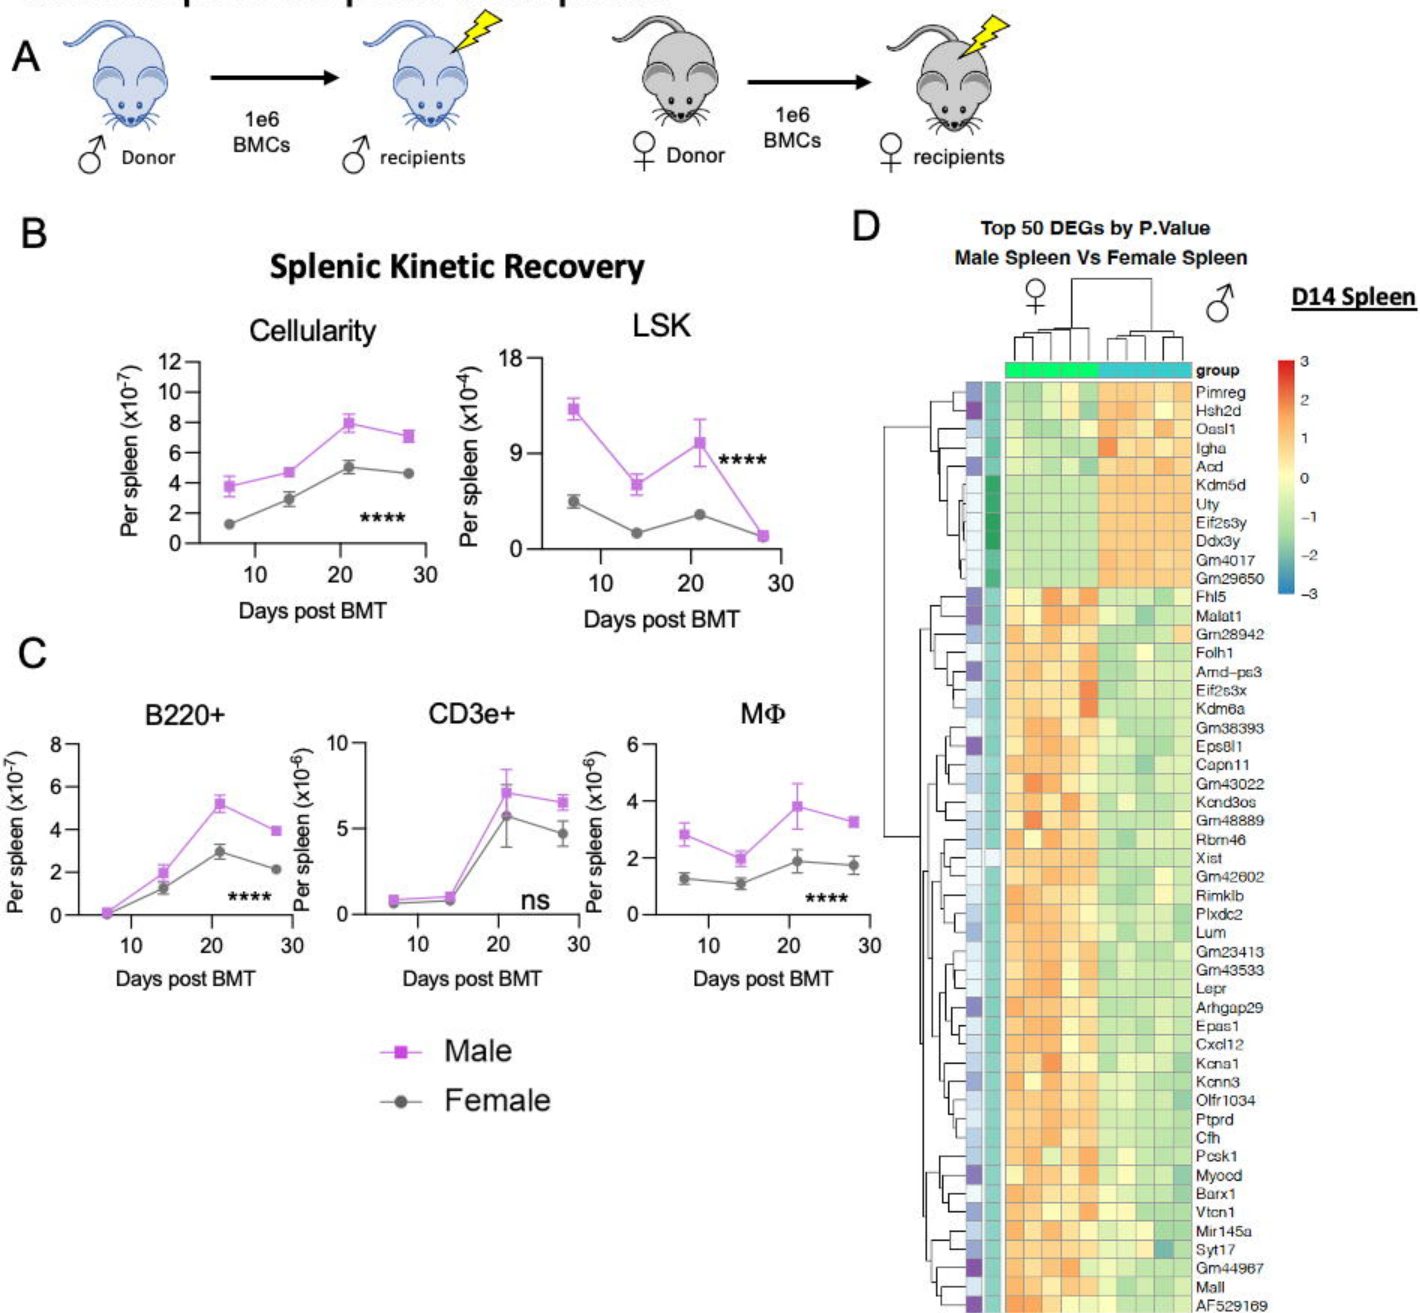

**Figure 5:** **A.** Schematic depicting transplant conditions. **B.** Splenic cellularity, and quantification of lineage-cKit<sup>+</sup>Sca1<sup>+</sup> (LSK) and LSK CD150<sup>+</sup>CD48<sup>-</sup> (LT-HSC) was obtained on cohorts of mice sacrificed on Days 7, 14, 21, and 28 post transplant. **C.** Quantification of splenic B-cells (B220<sup>+</sup>), T-cells (CD3e<sup>+</sup>), and Macrophages (F4/80<sup>+</sup>) on cohorts described in B. N=5 mice/arm for D7 and D28, N=10 mice/arm for D14, D21. N=5 mice/arm for Macrophages. Error bars represent SEM. 2-way ANOVA was performed and asterisks denote male vs. female. **D.** Heat map generated from bulk RNA sequencing on total BM populations of D14 post HST mice. Top 50 differentially expressed genes ranked by p-value. N=5 mice/arm.

# Figure 6: The male microenvironment drives hematopoietic recovery independent of donor HSC sex

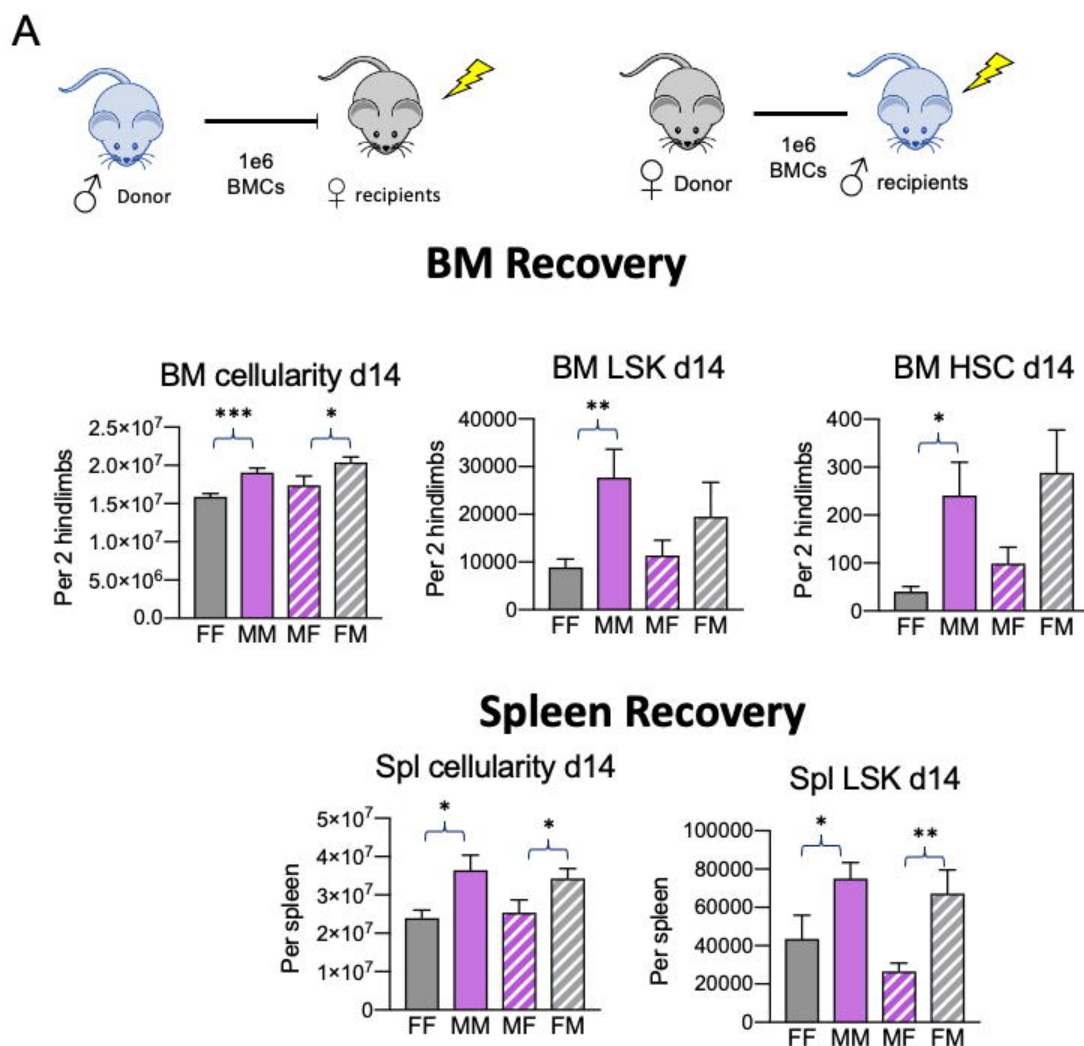

**Figure 6:** A. Schematic depicting transplant conditions. 1e6 BM cells from male donors were transplanted into lethally irradiated (10Gy) female recipients, and the equivalent performed using female donors and male recipients. B. BM and splenic cellularity, and quantification of lineage-cKit+Sca1+ (LSK) and LSK CD150+CD48- (LT-HSC) was obtained from mice sacrificed on Day 14 post transplant. N=10 mice/arm. Error bars represent SEM. \*\**P* < 0.01. Student's t-test used for all analyses.

# Figure 7: Estradiol supplementation to BM cultures significantly increases long-term HSCs

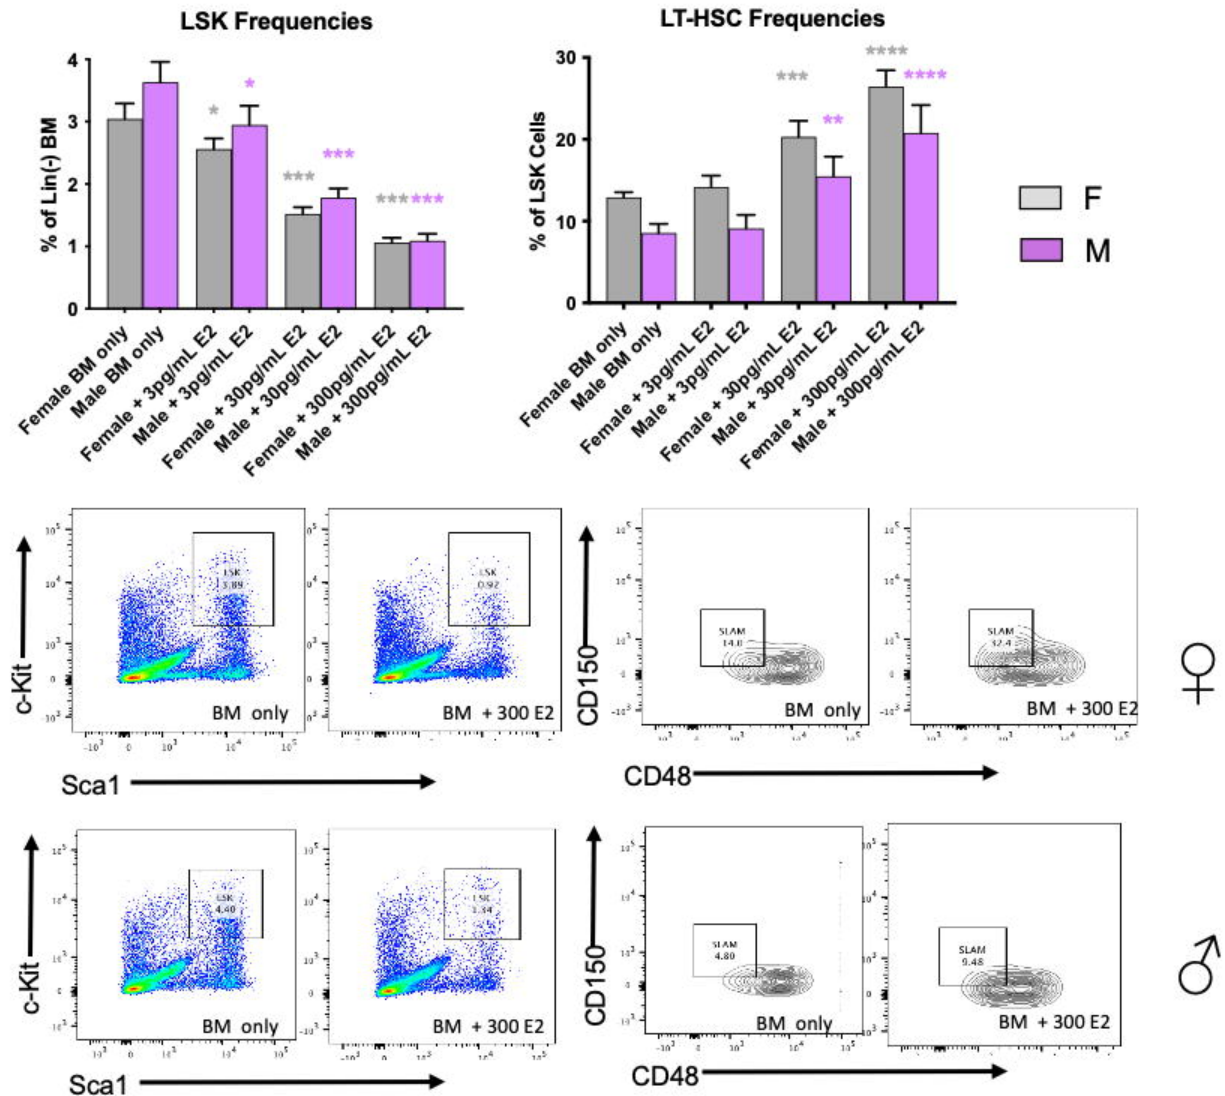

**Figure 7: A.** Frequencies of lineage-cKit+Sca1+ (LSK) and LSK CD150+CD48- (LT-HSC) following 5 days of total male and female BM cultured with the indicated doses of Estradiol (E2). **B.** Representative flow cytometric plots depicting BM LSK and LT-HSC populations on Day 5 cultures of BM only versus BM + 300 pg/mL E2. n=7 mice/arm. Error bars represent SEM. \*\*P < 0.01. Student's t-test used for all analyses and represent each experimental arm again untreated BM.
